# Supplementary material for: MIAs (Mirror Intracranial Aneurysms) – symmetrical coincidence or a true independent risk factor?
Source: Research Square preprint supplement (doi:10.21203/rs.3.rs-7437541/v1), 2025-08-29
Supplement: Supplementary file 1 [file aac5e387bb29fc2be3fd4628.docx]

Supplementary Appendix

This appendix has been created by the authors to give readers additional information about their work.

Supplement to: Roj B, Sun R, Ferguson L, et al. MIAs – symmetrical coincidence or a true independent risk factor?

***Supplemental Tables and Figure for on-line publication only***

## Supplemental Table 1 - Incidence rates per 100 person-years by group

| **Endpoint** | **Group** | **IR per 100 PY** | **95% CI** |
| --- | --- | --- | --- |
| All-cause mortality | ASymMultiples | 3.44 | 2.94–4.01 |
| All-cause mortality | MirrorMultiples | 5.52 | 4.33–6.94 |
| All-cause mortality | Single | 4.87 | 4.12–5.72 |
| SAH-specific mortality | ASymMultiples | 0.19 | 0.08–0.35 |
| SAH-specific mortality | MirrorMultiples | 1.21 | 0.69–1.96 |
| SAH-specific mortality | Single | 0.36 | 0.18–0.64 |
| First UIA rupture | ASymMultiples | 0.76 | 0.54–1.05 |
| First UIA rupture | MirrorMultiples | 1.74 | 1.10–2.61 |
| First UIA rupture | Single | 0.39 | 0.20–0.69 |
| Treatment initiation | ASymMultiples | 5.65 | 5.00–6.36 |
| Treatment initiation | MirrorMultiples | 5.75 | 4.53–7.19 |
| Treatment initiation | Single | 10.49 | 9.38–11.71 |

IR = incidence rate; PY = person-years; SAH = subarachnoid hemorrhage; UIA = unruptured intracranial aneurysm. Rates are crude with exact Poisson 95% confidence intervals.

## Supplemental Table 2 - Pairwise incidence rate ratios (IRR) by endpoint (Poisson with log person-time offset; robust SEs; BH-FDR)

| **Endpoint** | **Contrast** | **IRR** | **p-value** | **q-value (FDR)** |
| --- | --- | --- | --- | --- |
| All-cause mortality | MirrorMultiples vs ASymMultiples | 1.60 | 0.0010 | 0.0031 |
| All-cause mortality | Single vs ASymMultiples | 1.42 | 0.0026 | 0.0038 |
| All-cause mortality | MirrorMultiples vs Single | 1.13 | 0.3927 | 0.3927 |
| SAH-specific mortality | MirrorMultiples vs ASymMultiples | 6.37 | 0.0001 | 0.0002 |
| SAH-specific mortality | MirrorMultiples vs Single | 3.36 | 0.0038 | 0.0057 |
| SAH-specific mortality | Single vs ASymMultiples | 1.90 | 0.1980 | 0.1980 |
| First UIA rupture | MirrorMultiples vs Single | 4.46 | 0.0001 | 0.0003 |
| First UIA rupture | MirrorMultiples vs ASymMultiples | 2.29 | 0.0029 | 0.0044 |
| First UIA rupture | ASymMultiples vs Single | 1.95 | 0.0628 | 0.0628 |
| Treatment initiation | Single vs ASymMultiples | 1.86 | <0.0001 | <0.0001 |
| Treatment initiation | Single vs MirrorMultiples | 1.83 | <0.0001 | <0.0001 |
| Treatment initiation | MirrorMultiples vs ASymMultiples | 1.02 | 0.8950 | 0.8950 |

IRR estimated from Poisson regression with log(person-time) offset and Huber–White robust standard errors; p-values are two-sided Wald tests; q-values are Benjamini–Hochberg false discovery rate–adjusted.

## Supplemental Table 3 - Per-aneurysm risk by endpoint and group (Wilson 95% CI)

| **Endpoint** | **Group** | **Events (n)** | **Aneurysms (n)** | **Risk %** | **95% CI** |
| --- | --- | --- | --- | --- | --- |
| Rupture | Single | 12 | 799 | 1.50 | 0.86–2.61 |
| Rupture | ASymMultiples | 12 | 897 | 1.34 | 0.77–2.32 |
| Rupture | MirrorMultiples | 7 | 289 | 2.42 | 1.18–4.91 |
| Growth ≥1 mm | Single | 65 | 799 | 8.14 | 6.43–10.24 |
| Growth ≥1 mm | ASymMultiples | 75 | 897 | 8.36 | 6.72–10.36 |
| Growth ≥1 mm | MirrorMultiples | 38 | 289 | 13.15 | 9.73–17.53 |
| Morphology change | Single | 29 | 799 | 3.63 | 2.54–5.16 |
| Morphology change | ASymMultiples | 28 | 897 | 3.12 | 2.17–4.47 |
| Morphology change | MirrorMultiples | 22 | 289 | 7.61 | 5.08–11.26 |

Risk is per aneurysm; CIs are Wilson score intervals.

## Supplemental Table 4 - GEE (modified Poisson, patient-clustered) risk ratios vs Single

| **Endpoint** | **Contrast (vs Single)** | **RR** | **95% CI (low)** | **95% CI (high)** | **p-value** |
| --- | --- | --- | --- | --- | --- |
| Rupture | ASymMultiples vs Single | 0.95 | 0.40 | 2.22 | 0.9035 |
| Rupture | MirrorMultiples vs Single | 1.49 | 0.49 | 4.50 | 0.4787 |
| Growth ≥1 mm | ASymMultiples vs Single | 1.03 | 0.74 | 1.43 | 0.8818 |
| Growth ≥1 mm | MirrorMultiples vs Single | 1.67 | 1.09 | 2.56 | 0.0183 |
| Morphology change | ASymMultiples vs Single | 0.86 | 0.51 | 1.44 | 0.5688 |
| Morphology change | MirrorMultiples vs Single | 2.10 | 1.21 | 3.64 | 0.0081 |

Population-averaged RRs from GEE with Poisson log link; exchangeable working correlation; robust SEs clustered by patient.

## Supplemental Table 5 - Pairwise GEE risk ratios (Wald tests, patient-clustered) with FDR

| **Endpoint** | **Group 1** | **Group 2** | **RR** | **95% CI (low)** | **95% CI (high)** | **p-value** | **q-value (FDR)** |
| --- | --- | --- | --- | --- | --- | --- | --- |
| Rupture | Single | ASymMultiples | 0.95 | 0.40 | 2.22 | 0.9035 | 0.9035 |
| Rupture | Single | MirrorMultiples | 1.49 | 0.49 | 4.50 | 0.4787 | 0.7180 |
| Rupture | ASymMultiples | MirrorMultiples | 1.57 | 0.50 | 4.95 | 0.4400 | 0.7180 |
| Growth ≥1 mm | Single | ASymMultiples | 1.03 | 0.74 | 1.43 | 0.8818 | 0.8818 |
| Growth ≥1 mm | Single | MirrorMultiples | 1.67 | 1.09 | 2.56 | 0.0183 | 0.0380 |
| Growth ≥1 mm | ASymMultiples | MirrorMultiples | 1.63 | 1.06 | 2.50 | 0.0253 | 0.0380 |
| Morphology change | Single | ASymMultiples | 0.86 | 0.51 | 1.44 | 0.5688 | 0.5688 |
| Morphology change | Single | MirrorMultiples | 2.10 | 1.21 | 3.64 | 0.0081 | 0.0121 |
| Morphology change | ASymMultiples | MirrorMultiples | 2.44 | 1.40 | 4.28 | 0.0018 | 0.0053 |

Pairwise Wald contrasts are patient-clustered with Benjamini–Hochberg FDR control across tests within each endpoint.

Supplemental Table 6 – Details of Cox Proportional Hazard model coefficients

|  | **coef** | **Exp**  **(coef)** | **coef lower 95%** | **coef upper 95%** | | **Exp**  **(coef) lower 95%** | **Exp (coef) upper 95%** |
| --- | --- | --- | --- | --- | --- | --- | --- |
| **Aneurysm outer diameter at diagnosis (mm)** | 0.05 | 1.05 | 0.01 | 0.09 | 1.01 | | 1.09 |
| **Total number of aneurysms** | 0.16 | 1.17 | -0.07 | 0.39 | | 0.94 | 1.47 |
| **Is_MCA** | -1.03 | 0.36 | -1.73 | -0.33 | | 0.18 | 0.72 |
| **Is_ICA** | -0.87 | 0.42 | -1.58 | -0.16 | | 0.21 | 0.85 |
| **Is_ACA** | -0.75 | 0.47 | -1.61 | 0.10 | | 0.20 | 1.11 |
| **Is_Mirror** | **1.44** | **4.24** | **0.51** | **2.38** | | **1.66** | **10.84** |
| **Is_ASymMultiple** | 0.52 | 1.68 | -0.31 | 1.34 | | 0.73 | 3.84 |

***Mirror variable highlighted in blue***

Variables used in the Cox proportional hazards modelling with:

- Corresponding coefficients (coef)

- Exponentiated coefficients (exp(coef))

- Coefficient 95% confidence interval lower boundary (coef lower 95%)

- Coefficient 95% confidence interval upper boundary (coef upper 95%)

- Exponentiated coefficient 95% confidence interval lower boundary (exp(coef) lower 95%)

- Exponentiated coefficient 95% confidence interval upper boundary (exp(coef) upper 95%)

Supplemental Figure 1 – Hazard ratio of mortality variables


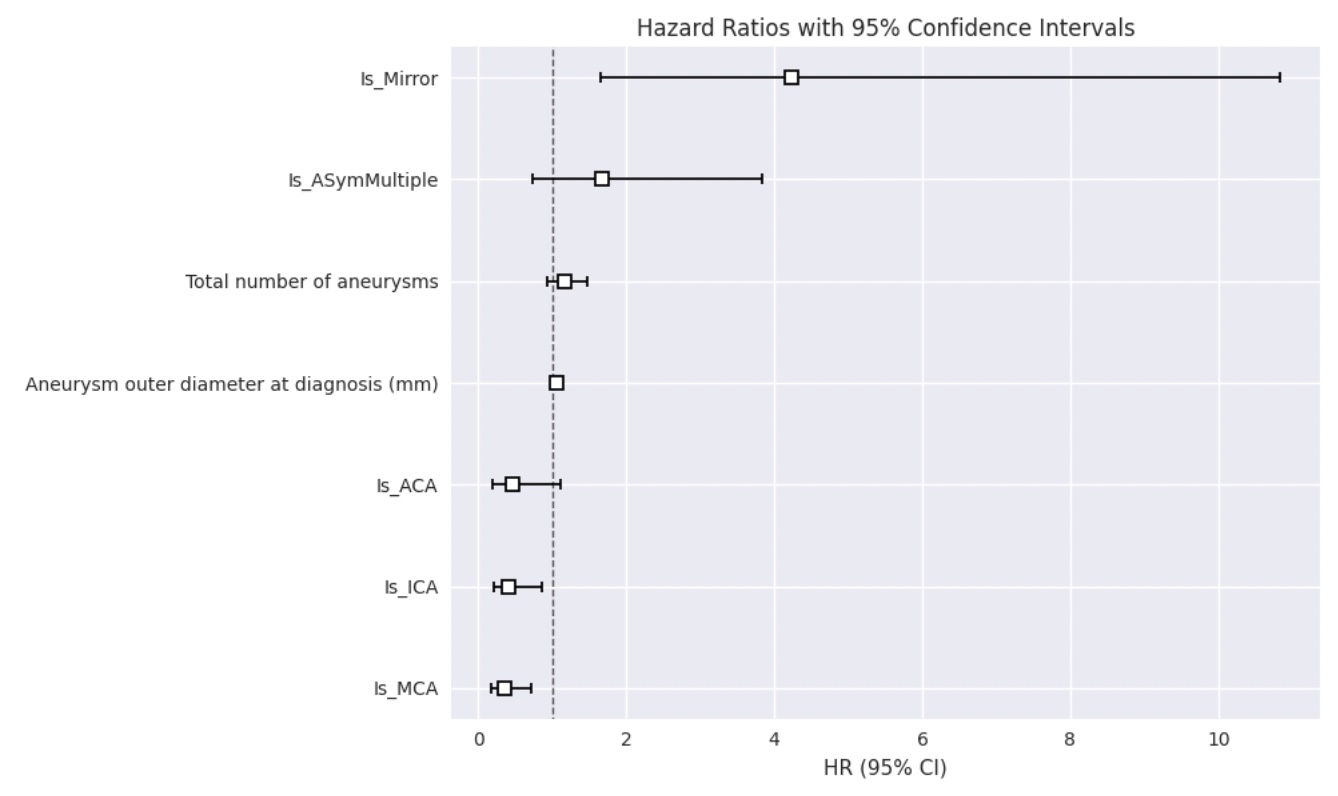


Forest plot showing the hazard ratio and 95% confidence intervals of mortality variables
